# Supplementary material for: Determination of four arsenic species in soil by sequential extraction and high performance liquid chromatography with post-column hydride generation and inductively coupled plasma optical emission spectrometry detection
Source: Royal Society of Chemistry journal article supplement (doi:10.1039/b820300h), 2009-01-01
Supplement: b820300h.pdf [file b820300h.pdf]

**Determination of four arsenic species in soil by sequential extraction and high performance liquid chromatography with post-column hydride generation and inductively coupled plasma optical emission spectrometry detection**

Khalid H. Al-Assaf, Julian F. Tyson\* and Peter C. Uden

*Supplementary material.*

Soil analysis report.

**Fig. S1.** Effect of (a) NaBH<sub>4</sub> concentration, (b) NaBH<sub>4</sub> flow rate, (c) hydrochloric acid flow rate, (d) nebulizer flow rate, (e) plasma viewing distance, and (f) RF power.

**Fig. S2.** The effect of sonication time on the oxidation of 1.0 mg l<sup>-1</sup> As(III) prepared in (a) deionized water, (b) 0.01 mol l<sup>-1</sup> NaOH and (c) 0.01 mol l<sup>-1</sup> H<sub>3</sub>PO<sub>4</sub>.

SOIL ANALYSIS REPORT FOR RESEARCH

06/24/05

SOIL AND PLANT TISSUE TESTING LAB  
 WEST EXPERIMENT STATION  
 UNIVERSITY OF MASSACHUSETTS  
 AMHERST, MA 01003

LAB NUMBER: S050622-141  
 BAG NUMBER: 62899

SOIL WEIGHT: 5.32 g/5cc

DR. BARKER  
 BOWDITCH HALL  
 CAMPUS

COMMENTS:

-----  
 ANALYSIS REPORT

SAMPLE ID: NICA  
 SOIL TYPE:

SOIL PH 6.8 ALUMINUM (AL): 35 PPM (Soil Range: 10-300)  
 BUFFER PH 7.0 ORGANIC MATTER: 1.3 %. Desirable range 4-8%.

| NUTRIENT LEVELS: PPM | LOW                                  | MEDIUM | HIGH | VERY HIGH |
|----------------------|--------------------------------------|--------|------|-----------|
| PHOSPHORUS (P) 8     | XXXXXXXXXXXX                         |        |      |           |
| POTASSIUM (K) 127    | XXXXXXXXXXXXXXXXXXXXXXXXXXXXXXXXXXXX |        |      |           |
| CALCIUM (CA) 281     | XXXXXXXXXX                           |        |      |           |
| MAGNESIUM (MG) 42    | XXXXXXXXXXXX                         |        |      |           |
| AMMONIUM (NH4-N) 1   | XX                                   |        |      |           |
| NITRATE (NO3-N) 1    |                                      |        |      |           |

CATION EXCH CAP 2.0 MEQ/100G PERCENT BASE SATURATION K=15.6 MG=16.6 CA=67.9 SOLUBLE SALTS 0.13 dS/M (Soil Range: 0.08-0.50)

| MICRONUTRIENT  | PPM | SOIL RANGE | MICRONUTRIENT | PPM | SOIL RANGE |
|----------------|-----|------------|---------------|-----|------------|
| Boron (B)      | 0.1 | 0.1-2.0    | Copper (Cu)   | 0.9 | 0.3-8.0    |
| Manganese (Mn) | 0.8 | 3 - 20     | Iron (Fe)     | 3.5 | 1.0- 40    |
| Zinc (Zn)      | 0.4 | 0.1- 70    |               |     |            |

EXTRACTED LEAD (PB) 1 PPM. ESTIMATED TOTAL LEAD IS 34 PPM.  
 EXTRACTED CADMIUM (CD) 0.0 PPM.  
 EXTRACTED NICKEL (NI) 0.1 PPM. EXTRACTED CHROMIUM (CR) 0.0 PPM.

-----  
 COMMENTS

COMPUTER PROGRAM & RECOMMENDATIONS BY DEPT OF PLANT & SOIL SCI UMASS-AMHERST.

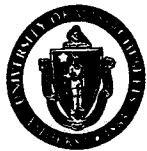

Soil and Plant Nutrient Testing Lab  
 West Experiment Station  
 University of Massachusetts  
 Amherst, MA 01003  
 413.545.2311  
<http://www.umass.edu/plsoils/soiltest>

06/24/05

TEXTURAL ANALYSIS RESULTS

Customer Name: Dr Barker  
 Bowditch Hall  
 Campus

Sample ID: S050622-141

Customer Designation: NICA

USDA SIZE FRACTIONS

| Main Fractions | Size (mm)  | Percent |
|----------------|------------|---------|
| Sand           | 0.05-2.0   | 35.5    |
| Silt           | 0.002-0.05 | 59.8    |
| Clay           | < 0.002    | 4.7     |
| Total          | < 2.0      | 100.0   |

| Sand Fractions | Size (mm) | Percent |
|----------------|-----------|---------|
| Very Coarse    | 1.0-2.0   | 0.2     |
| Coarse         | 0.5-1.0   | 0.5     |
| Medium         | 0.25-0.5  | 0.7     |
| Fine           | 0.10-0.25 | 4.4     |
| Very Fine      | 0.05-0.10 | 29.7    |
|                |           | 35.5    |

| Silt Fractions | Size (mm)   | Percent |
|----------------|-------------|---------|
| Coarse         | 0.02-0.05   | 39.9    |
| Medium         | 0.005-0.02  | 18.3    |
| Fine           | 0.002-0.005 | 1.6     |
|                |             | 59.8    |

PERCENT OF WHOLE SAMPLE PASSING

| Size (mm) | Sieve # | %    |
|-----------|---------|------|
| 2.00      | #10     | 99.8 |
| 1.00      | #18     | 99.6 |
| 0.50      | #35     | 99.1 |
| 0.25      | #60     | 98.4 |
| 0.10      | #140    | 94.0 |
| 0.05      | #270    | 64.4 |
| 0.02      | 20 um   | 24.6 |
| 0.005     | 5 um    | 6.3  |
| 0.002     | 2 um    | 4.7  |

USDA Textural Class = silt loam

Gravel Content = 0.2%

COMMENTS:

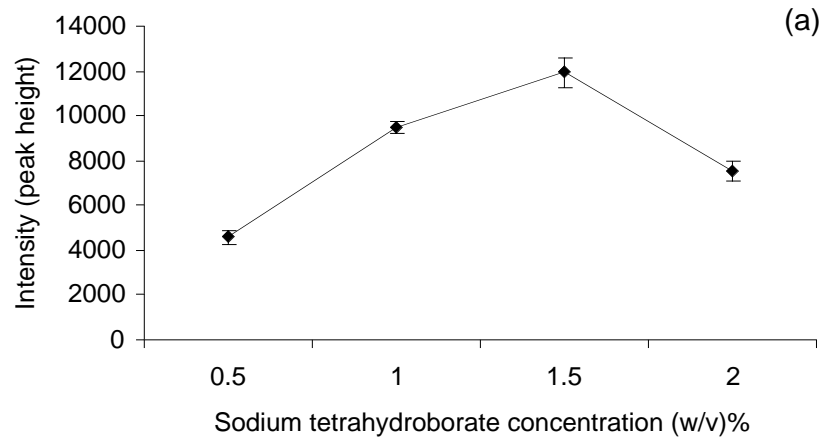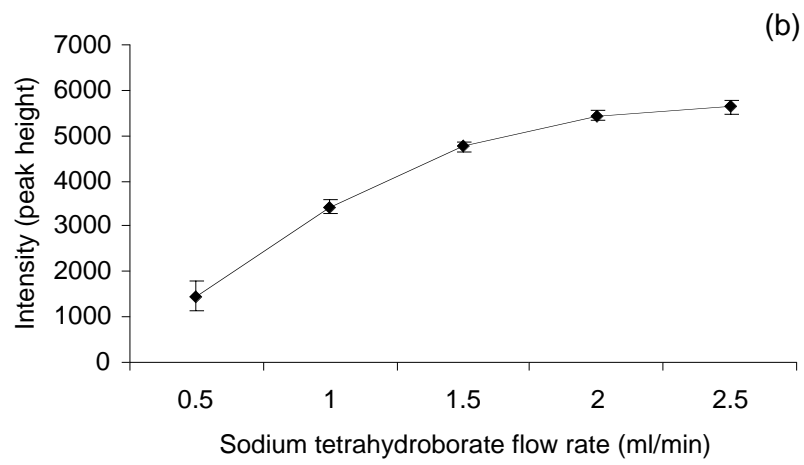

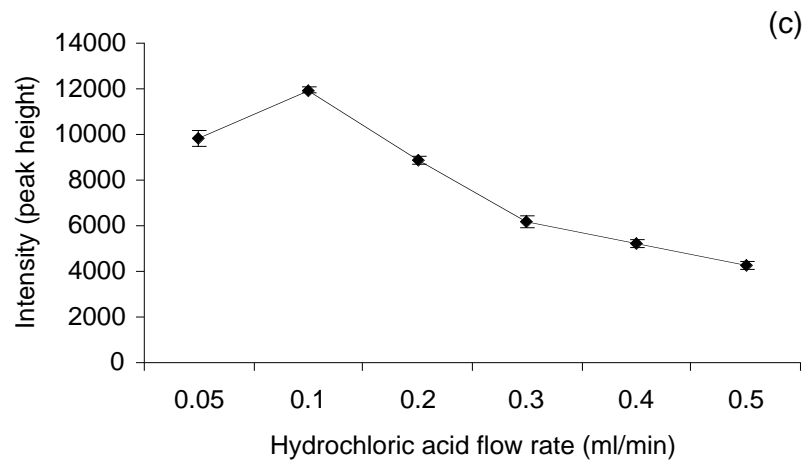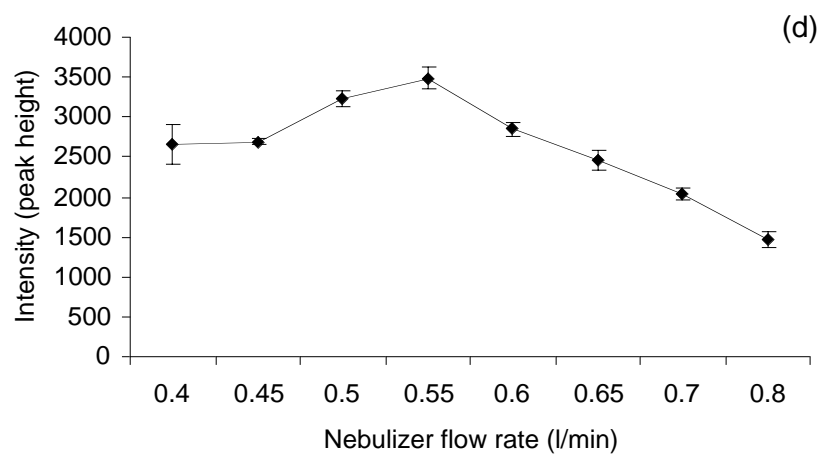

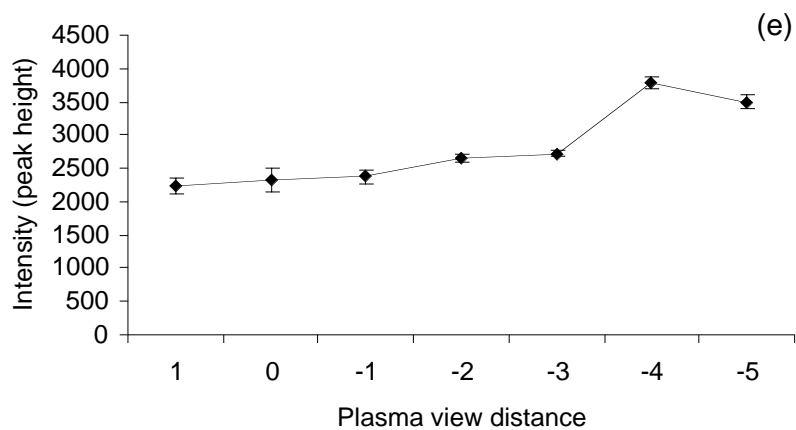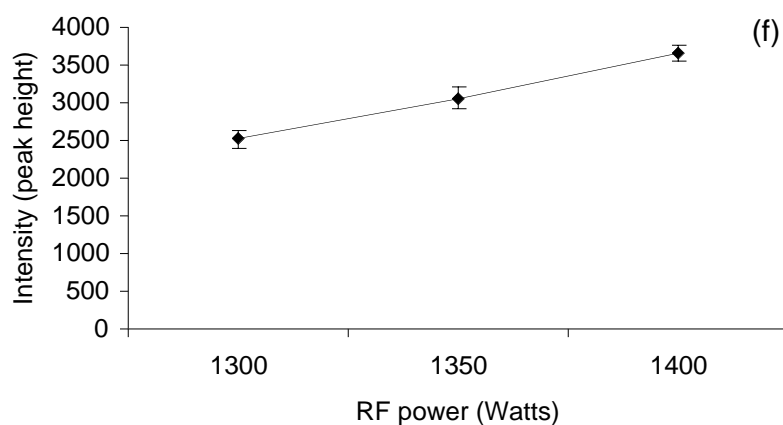

**Figure S1:** Effect of (a)  $\text{NaBH}_4$  concentration, (b)  $\text{NaBH}_4$  flow rate, (c) hydrochloric acid flow rate, (d) nebulizer flow rate, (e) plasma viewing distance, and (f) RF power. The plots are representative of the effect of each of the individual parameters and were obtained with the values of the other parameters either close to or at the optimum values. Arsenic concentration was  $0.1 \mu\text{g l}^{-1}$  as arsenite at flow rate  $1 \text{ ml min}^{-1}$ . Error bars are mean  $\pm$  standard deviation ( $n = 3$ ).

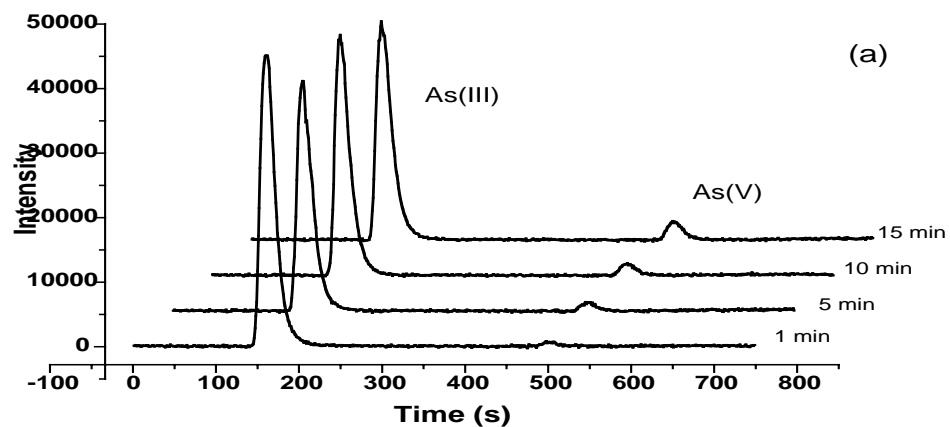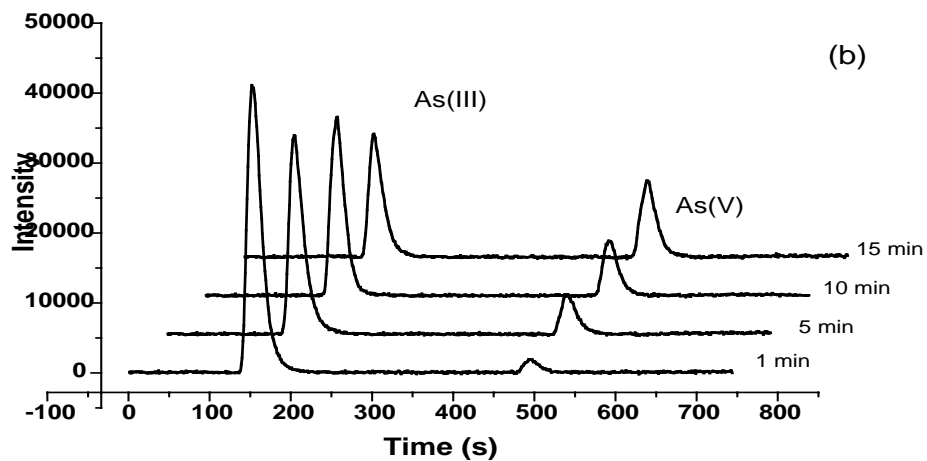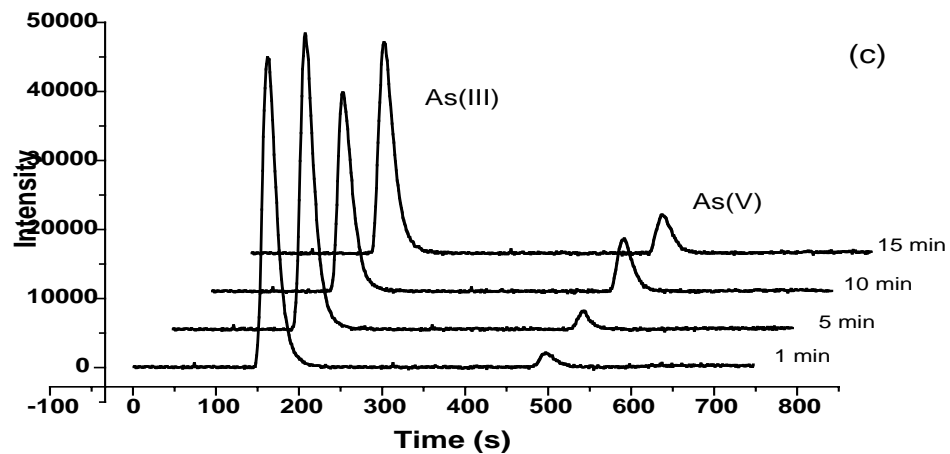

**Fig. S2.** The effect of sonication time on the oxidation of  $1.0 \text{ mg l}^{-1}$  As(III) prepared in (a) deionized water, (b)  $0.01 \text{ mol l}^{-1}$  NaOH and (c)  $0.01 \text{ mol l}^{-1}$   $\text{H}_3\text{PO}_4$ .
